### Observed Environments

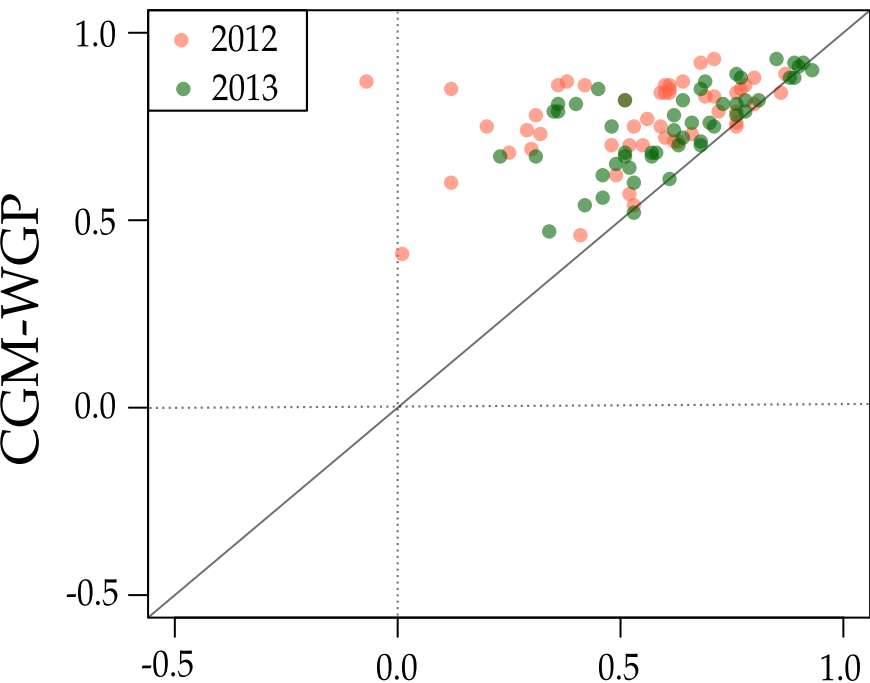

### New Environments

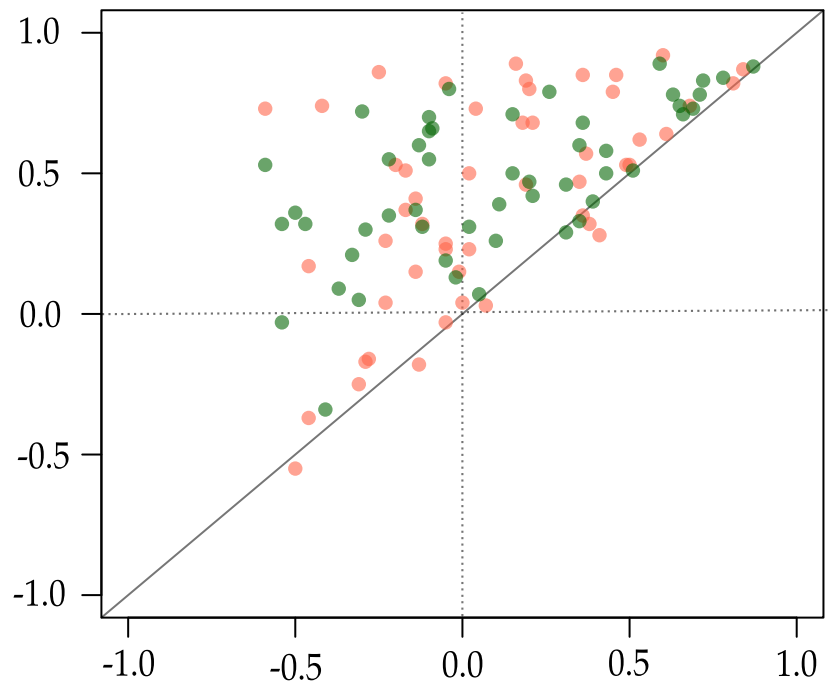

GBLUP

Figure S2. CGM-WGP vs. GBLUP prediction accuracy in 50 synthetic data sets.
